**The sRNA MicC downregulates *hilD* translation to control the SPI1 T3SS in  
*Salmonella enterica* serovar Typhimurium**

Fatih Cakar<sup>1</sup>, Yekaterina A. Golubeva<sup>1</sup>, Carin K. Vanderpool<sup>1</sup> and James M. Slauch<sup>1</sup>

<sup>1</sup>Department of Microbiology

University of Illinois at Urbana-Champaign

Running Title: MicC regulates *hilD* translation

#Corresponding Author. E-mail: [slauch@illinois.edu](mailto:slauch@illinois.edu)

Department of Microbiology

University of Illinois

B102 Chemical and Life Sciences Laboratory

601 S Goodwin Avenue

Urbana Illinois, 61801

Phone: (217) 244-1956

## 18 **ABSTRACT**

1 *Salmonella enterica* serovar Typhimurium invades the intestinal epithelium and induces  
2 inflammatory diarrhea using the *Salmonella* pathogenicity island 1 (SPI1) type III secretion system  
3 (T3SS). Expression of the SPI1 T3SS is controlled by three AraC-like regulators, HilD, HilC and  
4 RtsA, which form a feed-forward regulatory loop that leads to activation of *hilA*, encoding the main  
5 transcriptional regulator of the T3SS structural genes. This complex system is affected by  
6 numerous regulatory proteins and environmental signals, many of which act at the level of *hilD*  
7 mRNA translation or HilD protein function. Here, we show that the sRNA MicC blocks translation  
8 of the *hilD* mRNA by base pairing near the ribosome binding site. This binding blocks translation  
9 but does not induce degradation of the *hilD* message. Our data indicate that *micC* is  
10 transcriptionally activated by SlyA, and SlyA feeds into the SPI1 regulatory network solely through  
11 MicC. Transcription of *micC* is negatively regulated by the OmpR/EnvZ two-component system,  
12 but this regulation is dependent on SlyA. OmpR/EnvZ control SPI1 expression partially through  
13 MicC, but also affect expression through other mechanisms. MicC-mediated regulation plays a  
14 role during infection, as evidenced by an increase in *Salmonella* fitness in the intestine in the *micC*  
15 deletion mutant that is dependent on the SPI1 T3SS. These results further elucidate the complex  
16 regulatory network controlling SPI1 expression and add to the list of sRNAs that control this  
17 primary virulence factor.

## 18 **IMPORTANCE**

19 The *Salmonella* SPI1 T3SS is the primary virulence factor required for causing intestinal disease  
20 and initiating systemic infection. The system is regulated in response to a large variety of  
21 environmental and physiological factors such that the T3SS is expressed at only the appropriate  
22 time and place in the host during infection. Here we show how the sRNA MicC affects expression  
23 of the system. This work adds to our detailed mechanistic studies aimed at a complete  
24 understanding of the regulatory circuit.

## 25 **INTRODUCTION**

26 *Salmonella enterica* serovar Typhimurium causes inflammatory diarrhea and potentially  
27 life-threatening systemic infection, with an estimated global burden of ~95 million cases per year  
28 world-wide (1). Upon oral ingestion, *Salmonella* transits through the stomach to reach the distal  
29 ileum of the small intestine, the initial site of colonization (2, 3). *Salmonella* invades the intestinal  
30 epithelium of the host and induces inflammatory diarrhea using the *Salmonella* pathogenicity  
31 island 1 (SPI1) type III secretion system (T3SS), a needle-like structure that injects effector  
32 proteins into the host cell cytosol (4).

33 The SPI1 T3SS is controlled by three AraC-like transcriptional regulators, HilD, HilC and  
34 RtsA, which constitute a complex feed-forward regulatory loop, each activating transcription of  
35 the *hilD*, *hilC*, and *rtsA* genes, as well as activating *hilA*, encoding the transcriptional regulator of  
36 T3SS structural genes (Fig. 1)(5). This system is controlled in response to numerous regulatory  
37 proteins and environmental signals, many of which act at the level of *hilD* mRNA translation or  
38 stability, or HilD protein activity (6, 7). This includes regulation by a number of small RNAs (8).

39 Small RNAs (sRNAs), generally 50 to 450 bp in length, are increasingly recognized as  
40 critical regulators of gene expression (9). Over 300 sRNAs are expressed in *Salmonella*. They  
41 play important roles in the regulation of envelope stress responses, metabolism, and virulence.  
42 However, the function of most of these sRNAs is unknown or only partially characterized. Many  
43 sRNAs control gene expression by imperfect base-pairing with an mRNA near the ribosome  
44 binding site (RBS), mediated by the RNA chaperone Hfq (9, 10). This blocks access to the 30S  
45 ribosomal subunit, inhibiting translation initiation. In some cases, this also leads to RNaseE-  
46 mediated degradation of the message (11).

47 The OmpR/EnvZ two-component regulatory system was originally characterized as the  
48 regulator of the OmpF and OmpC porins in response to changes in osmolarity (12). OmpR/EnvZ  
49 is now understood to be a global regulator of virulence in *Salmonella*, activating both the SPI2  
50 and SPI1 type three secretion systems, despite the fact that these systems are primarily required  
51 in different niches (13-15). The transmembrane histidine kinase EnvZ autophosphorylates and  
52 transfers a phosphoryl group to the response regulator OmpR. At low concentrations of OmpR-  
53 P, *ompF* is activated, while at high concentrations of OmpR-P, *ompF* is repressed and *ompC* is  
54 activated (16). The sRNA MicF is transcribed upstream and antisense to *ompC* by OmpR. MicF,  
55 one of the first sRNAs identified (17, 18), base pairs with the *ompF* mRNA to block translation  
56 and facilitate the transition from producing OmpF to OmpC porin in high osmolarity. More recently,  
57 the MicC sRNA was identified and characterized as a regulator of the outer membrane porin  
58 OmpC in *E. coli* that acts by binding to the *ompC* mRNA near the RBS to prevent 30S ribosome  
59 loading (19). In *Salmonella*, MicC downregulates both OmpC and OmpD, binding in the *ompD*  
60 coding sequence to initiate RNase-E dependent mRNA degradation (20). Chen et al. (19)  
61 reported that *micC* transcription is negatively regulated by OmpR/EnvZ in *E. coli*. Transcriptomic  
62 data suggested that *micC* is regulated by OmpR/EnvZ, RpoS, and SlyA in *Salmonella* (21), but  
63 regulation of *micC* has not been characterized in detail. SlyA is a member of MarR/SlyA family of  
64 bacterial transcriptional regulators. In *Salmonella*, *slyA* mutants are significantly attenuated in the  
65 mouse model of infection (22). SlyA acts both positively and negatively to control expression of

66 some 30 genes (23-26). SlyA controls some genes independently, but often functions in concert  
67 with other transcriptional regulators, including PhoP and OmpR (23, 27, 28).

68 In this study, we define a new regulatory role for MicC sRNA, controlling the SPI1 T3SS  
69 in *Salmonella*. We found that MicC base pairs with the leader sequence of *hilD* mRNA to  
70 negatively regulate translation of *hilD*. MicC-mediated SPI1 regulation is dependent on  
71 environmental signals and regulated through both SlyA and the OmpR/EnvZ two-component  
72 system, which acts through or in conjunction with SlyA. We also show that MicC-dependent  
73 regulation of SPI1 is important during intestinal infection.

## 74 RESULTS

75 **The small RNA MicC downregulates the expression of HilD.** Several regulatory proteins and  
76 signals affecting expression of the SPI1 T3SS act at the level of *hilD* mRNA translation (7). In the  
77 few cases that have been characterized, this regulation is mediated either by the RNA binding  
78 protein CsrA (29) or sRNAs (30). We previously screened a set of highly conserved sRNAs for  
79 those that decrease *hilD* translation when overproduced, and subsequently characterized  
80 regulation of HilD translation by FnrS and ArcZ (8). This screen also identified the 109 nucleotide  
81 sRNA MicC, first characterized as a regulator of *ompC*, encoding the OmpC porin protein in *E.*  
82 *coli* (19). MicC is encoded in the intergenic region downstream of the pyruvate-flavodoxin  
83 oxidoreductase gene (*nifJ*) in both *E. coli* and *Salmonella* and is conserved in the  
84 Enterobacteriaceae (Fig. 2A). In *Salmonella*, MicC downregulates translation of the *ompC* and  
85 *ompD* mRNAs by base pairing using the highly conserved 5' 20-30 nucleotides (20).

86 To understand the regulation of the SPI1 T3SS system of *Salmonella* by MicC, we  
87 overexpressed MicC from the pBRplac plasmid (31) in *Salmonella* strains harboring either an in  
88 locus *hilD*'-'*lacZ* translational fusion or a *hilA*'-'*lacZ*<sup>+</sup> transcriptional fusion. Note that the *hilD* fusion  
89 strain is a *hilD* null. Thus, this fusion represents the basal level of transcription and is not  
90 autoregulated. The *Salmonella* cultures were inoculated in No Salt LB (NSLB) overnight and sub-  
91 cultured in High Salt LB (HSLB) for 3 hrs to induce SPI1. The expression of *hilD* was  
92 downregulated ~3-fold in the pMicC strain (Fig. 2B). Expression of *hilA* was decreased 10-fold by  
93 MicC (Fig. 2B). These data suggest that MicC negatively regulates HilD expression, leading to a  
94 more dramatic effect on *hilA* transcription, consistent with the feed-forward loop model (Fig. 1).  
95 To ensure that this is a direct effect on *hilD*, we introduced the MicC plasmid into an *E. coli* strain  
96 containing a P<sub>BAD</sub>-*hilD*'-'*lacZ* translational fusion with an arabinose-inducible promoter. The fusion  
97 consists of the 35-nt 5' UTR and the first 11 codons of *hilD* fused in-frame to *lacZ*. Overexpression

98 of MicC in *E. coli* downregulated the expression of *hilD* more than 2-fold (Fig. 2B). These results  
99 suggest that MicC acts directly on the *hilD* mRNA to inhibit translation.

100 **MicC targets the 5' UTR of *hilD* mRNA by direct base pairing.** Bioinformatic analysis using  
101 IntraRNA (<http://rna.informatik.uni-freiburg.de/IntaRNA/Input.jsp>) suggested that MicC has a  
102 binding site in the *hilD* mRNA immediately upstream of the ribosome binding site (RBS; Fig. 3A).  
103 Based on this prediction, we mutated nucleotides 1 to 5 and 11 to 14 as indicated in the pMicC  
104 plasmid. We measured  $\beta$ -galactosidase activity in the *Salmonella hilD'*-*lacZ* translational fusion  
105 strain expressing the MicC mutant (pMicC-mt). The pMicC-mt plasmid conferred no significant  
106 repression of *hilD* (Fig. 3B). We then introduced the pMicC-mt plasmid into the *E. coli* P<sub>BAD</sub>-*hilD'*-  
107 *lacZ* fusion strain. Consistent with the result in *Salmonella*, overexpression of MicC-mt did not  
108 regulate *hilD* expression (Fig. 3C). Based on the predicted interaction, we introduced  
109 compensatory mutations in nucleotides -18 to -26 of *hilD* in the P<sub>BAD</sub>-*hilD'*-*lacZ* fusion (Fig. 3A).  
110 Overexpression of the wild type MicC had no significant effect on this fusion, whereas the MicC-  
111 mt downregulated the mutant *hilD* mRNA (Fig. 3C). These data support the proposed base-pairing  
112 interaction between MicC and the *hilD* mRNA. It should be noted that several point mutations and  
113 double mutations did not affect the interaction, suggesting that the base-pairing is relatively  
114 robust. Similar robust base-pairing interactions were also observed between sRNA MicC and  
115 *ompC* mRNA (19) and *ompD* mRNA (20) targets.

116 The data above show that MicC affects translation of *hilD*. We also tested the effect of  
117 overexpressed MicC on *hilC* and *rtsA* using translational LacZ fusions in *Salmonella*. In *hilD*<sup>+</sup>  
118 strains, expression of MicC led to a decrease in expression of both *hilC* and *rtsA* (Fig. 4A).  
119 However, there was no effect in the *hilD* null background, consistent with the fact that MicC inhibits  
120 *hilD* translation (Fig. 4B). Reduced levels of HilD protein decreased transcription of *hilC* and *rtsA*,  
121 consistent with the feed-forward loop model (Fig. 1). MicC also did not directly affect translation  
122 of either *hilC* or *rtsA* in *E. coli* (Fig. 4C). MicC downregulates *hilA* transcription via HilD (Fig. 2B).  
123 To confirm that MicC does not affect *hilA* translation, we overexpressed MicC in an *E. coli* strain  
124 containing a *hilA'*-*lacZ* translational fusion. MicC had no effect on the expression of this fusion  
125 (Fig. 4C). All of these results are consistent with MicC solely regulating *hilD* translation to affect  
126 transcription of *hilC*, *rtsA* and *hilA*.

127 **MicC requires Hfq but not RNase E for *hilD* mRNA regulation.** The RNA chaperone Hfq is a  
128 vital facilitator of sRNA-mRNA imperfect base-pairing (32). To test if the MicC-*hilD* mRNA  
129 interaction is dependent on Hfq, we measured *hilD* expression levels in an *hfq* mutant *Salmonella*  
130 after introducing the MicC plasmid. There was no significant regulation mediated by MicC in the  
131 *hfq* background, suggesting that the interaction and perhaps MicC stability require the Hfq

132 chaperone protein (Fig. 5A). Consistent with our result, Hfq is essential for MicC-dependent  
133 regulation OmpC in *E. coli* (19) and OmpD in *Salmonella* (20).

134 Negative regulation by sRNAs can be due to simple inhibition of translation initiation or  
135 initiation of mRNA degradation by RNaseE. We measured the effects of MicC overproduction on  
136 the *Salmonella hilD*'-*lacZ* fusion in an *rne131* background strain, which has a defect in RNA  
137 degradosome assembly (8, 33-35). Although absolute expression of the *hilD* fusion was increased  
138 in the *rne131* background, MicC was still able to regulate (Fig. 5B). Therefore, we conclude that  
139 MicC base-pairing to the *hilD* mRNA blocks translation initiation but does not induce mRNA  
140 degradation.

141 **MicC expression is activated by SlyA and repressed by OmpR/EnvZ.** Studies in *E. coli* (19)  
142 and transcriptomic analysis in *Salmonella* (21) suggested that MicC expression is repressed by  
143 OmpR/EnvZ and activated by SlyA. To characterize this regulation in more detail, we examined  
144 expression of a *micC*'-*lacZ*<sup>+</sup> fusion. Deletion of either *envZ* or *ompR* in the fusion strain resulted  
145 in increased transcription of MicC in the exponential growth phase (Fig. 6A), confirming that the  
146 OmpR/EnvZ two-component system negatively regulates MicC. Deletion of *slyA*, in contrast,  
147 caused a 3-fold decrease in expression, showing that SlyA is a positive regulator of *micC*  
148 expression. Importantly, in the absence of SlyA, deletion of *ompR* or *envZ* had no effect,  
149 suggesting that OmpR/EnvZ function through, or are at least dependent on, SlyA for their control  
150 of *micC* transcription (Fig. 6A).

151 To determine how this regulation affects SPI1 gene expression, we examined both a *hilD*'-  
152 '*lacZ* translational (Fig. 6B) and *hilA*'-*lacZ*<sup>+</sup> transcriptional fusions (Fig. 6C). Deletion of *micC*  
153 caused increased expression of both the *hilD* and *hilA* fusions, showing that MicC is affecting *hilD*  
154 translation under these conditions. As expected, deletion of *slyA* also led to an increase in  
155 expression of the *hilD* and *hilA* fusions, and deletion of *micC* in the *slyA* background had no further  
156 effect. These results show that SlyA is affecting SPI1 expression through MicC-mediated control  
157 of *hilD* translation.

158 Regulation by OmpR/EnvZ is more complicated. Deletion of *envZ* led to decreased  
159 expression of the *hilD*'-*lacZ* fusion, but this decreased expression was also seen in the *envZ slyA*  
160 *micC* background (Fig 6B). It is interesting to note that deletion of *envZ* has a greater effect than  
161 mutations in *ompR*, as noted previously (7, 13). Note also that our  $\Delta ompR::Cm$  allele is polar on  
162 the translationally coupled *envZ* (36). Thus, this decreased expression of the *hilD*'-*lacZ* fusion  
163 seen in the *envZ* mutant is functioning through OmpR, but is independent of MicC.

164 Deletion of *envZ* also caused decreased expression of *hilA* (Fig 6C) that is independent  
165 of SlyA and MicC. Loss of OmpR (and EnvZ) has no effect under these conditions. Our previous



166 data (7) showed that the primary effect of the *envZ* mutation in late stationary phase was to  
167 decrease HilD protein activity, leading to decreased expression of *hilA*. In the exponential phase  
168 data shown here, we also see an apparent effect on *hilD* transcription in the *envZ* mutant; we do  
169 not understand the mechanism. Thus OmpR/EnvZ, although controlling *micC* expression, also  
170 affect SPI1 independent of MicC, apparently through several mechanisms, which complicates  
171 interpretation of the data.

172 Transcriptomic data also implicated the sigma factor RpoS in the regulation of *micC* (21).  
173 As shown in Fig. S1A, deletion of *rpoS* caused increased expression of *micC* in early stationary  
174 phase but has no effect in exponential phase. Given that RpoS is acting negatively to control  
175 *micC*, this is likely an indirect effect. Deletion of *rpoS* also led to increased *hilD* transcription,  
176 particularly in stationary phase. This regulation was unaffected by loss of MicC (Fig. S1B). Thus,  
177 RpoS negatively regulates *hilD* by an unknown, and likely indirect mechanism (Fig. S1B), but this  
178 regulation is independent of MicC.

179 MicC is negatively regulated by OmpR/EnvZ and negatively regulates OmpC translation.  
180 Therefore, it was proposed to play a role in the differential osmoregulation of the porin proteins  
181 (19). As such, one would predict that MicC would be preferentially expressed at low osmolarity.  
182 We tested this hypothesis by examining expression of the *micC'*-*lacZ*<sup>+</sup> fusion in low and high salt  
183 LB (Fig. S2). As shown in Fig. S2B, expression of *micC* is increased in high salt. Moreover, this  
184 regulation is largely independent of OmpR/EnvZ. Thus, overall regulation of *micC* is inconsistent  
185 with a simple role in regulation of the porins in response to osmolarity.

186 **Deletion of MicC enhances SPI1 dependent fitness in vivo.** MicC regulates expression of the  
187 SPI1 T3SS via direct base pairing with the *hilD* mRNA. In vitro, this regulation is evident at mid-  
188 to late-exponential phase (Fig. 6). To determine if MicC affects SPI1 regulation in vivo in a manner  
189 that affects virulence, we performed competition assays using BALB/C mice. In oral infections,  
190 the  $\Delta micC$  strain outcompeted the wildtype strain in both the upper small intestine (includes  
191 duodenum and jejunum) and lower small intestine (includes ileum) (Fig. 7A), the primary site of  
192 *Salmonella* invasion into epithelium cells (2, 3, 37). There was no significant fitness advantage  
193 for bacteria recovered from the spleen after either oral or intraperitoneal (IP) infection (Fig. 7B);  
194 systemic infection does not require SPI1 (5, 38). To determine whether the observed effects in  
195 the intestine were due to changes in SPI1 expression, we also performed competition assays in  
196 strains lacking the SPI1 T3SS. In the  $\Delta spi1$  background, deletion of *micC* had no significant effect  
197 in the competition assay (Fig. 7C). These data are consistent with MicC having a significant  
198 regulatory role on *hilD* translation during intestinal infection.

199 **DISCUSSION**

200 The SPI1 T3SS is regulated in response to a plethora of physiological and environmental  
201 factors to ensure that this critical virulence factor is expressed at the appropriate time and place  
202 in the host and to optimize that expression. In this study, we identified the sRNA, MicC, as a  
203 repressor of *hilD* translation. MicC was previously identified as a negative regulator of the outer  
204 membrane porin proteins OmpC (19) and OmpD (20). MicC acts in the canonical fashion to control  
205 *hilD* translation, base pairing just upstream of the ribosome binding site (Fig. 3A). This binding  
206 blocks translation per se rather than initiating mRNA degradation (Fig. 3B). MicC also base pairs  
207 just upstream of the ribosome binding site in the *ompC* mRNA to block translation (19).  
208 Interestingly, in the case of *ompD*, MicC base pairs starting at 67 nucleotides downstream of the  
209 AUG and acts by initiating mRNA degradation versus blocking translation (20). MicC does not  
210 directly regulate *hilC*, *rtsA* or *hilA* (Fig. 4), showing that MicC-mediated downregulation of SPI1  
211 T3SS is solely through regulation of *hilD* mRNA translation. These data reinforce HilD as the  
212 primary site of signal integration in the SPI1 regulatory circuit (Fig. 1).

213 Expression data in *E. coli* and transcriptome data in *Salmonella* suggested that *micC*  
214 transcription is controlled by SlyA, OmpR/EnvZ, and RpoS (21). Our data suggest that the primary  
215 transcriptional activator of *micC* is SlyA (Fig. 6A). OmpR/EnvZ negatively regulate *micC*  
216 transcription by affecting SlyA activation. Whether this regulation is all occurring directly at the  
217 *micC* promoter will require further investigation, but SlyA often works in conjunction with other  
218 transcriptional regulators in the control of gene expression (23, 24, 27, 28). Comparison of the  
219 sequence upstream of *micC* in various Enterobacteriaceae reveals a strikingly conserved  
220 sequence between -31 and -50 from the transcription start site (Fig. 2A). This suggests that this  
221 sequence is important for regulation, but it matches neither the SlyA (39-41) nor the OmpR  
222 consensus sequence (42). We also show that RpoS negatively regulates *micC* transcription in  
223 early stationary phase. This is almost certainly an indirect effect and determining the mechanism  
224 will also require further analyses.

225 The physiological signals that influence SlyA are unclear, although salicylate binds to and  
226 inactivates SlyA, and, and loss of SlyA affects the overall response to reactive oxygen species  
227 (25, 43, 44). SlyA is strongly induced when *Salmonella* is replicating in macrophages and *slyA*  
228 mutants are not able to survive in macrophages and are, therefore, attenuated for virulence (28).  
229 Our data show that SlyA increases the expression of MicC, which helps to repress the SPI1 T3SS.  
230 This regulation is apparently evident in the intestine with the *micC* mutant outcompeting the  
231 wildtype, consistent with increased expression of the SPI1 T3SS. The SPI1 T3SS is neither  
232 expressed nor required during systemic infection and replication in macrophages (5, 45). Our data



233 suggest that this strong negative regulation of the system is mediated primarily by PhoPQ (46),  
234 but activation of MicC by SlyA may contribute to the downregulation of *hilD* transcription in the  
235 intracellular environment.

236 MicC, which is negatively regulated by OmpR and blocks *ompC* translation, was proposed  
237 to facilitate regulation of OmpF and OmpC in response to osmolarity (19). OmpR/EnvZ  
238 differentially regulate transcription of the porin genes such that *ompF* is preferentially transcribed  
239 in low osmolarity and *ompC* is preferentially transcribed in high osmolarity (12, 47). The sRNA  
240 MicF is co-transcribed with *ompC* and blocks *ompF* translation (18). Logic would dictate that MicC  
241 should be produced preferentially in low osmolarity to down regulate OmpC expression under  
242 these conditions. Interestingly, our results show that *micC* transcription increases with osmolarity  
243 (at least under the conditions we examined; Fig. S2) and that this regulation is independent of  
244 OmpR. Thus, the simple model does not hold. Indeed, OmpR is now known to be a global  
245 transcriptional regulator and most genes in the OmpR regulon are not osmoregulated (48), but  
246 rather activated at some threshold level of OmpR-P. Only if that threshold level is high, as in the  
247 case of *ompC*, is the gene preferentially activated at high osmolarity. Transcriptional regulation of  
248 *ompF* is more complex and apparently unique, being activated at low levels of OmpR-P, but then  
249 actively repressed by OmpR-P at higher levels (47-49). Negative regulation of *micC* by  
250 OmpR/EnvZ is via SlyA and the overall osmoregulation of *micC* is independent of the two-  
251 component system.

252 OmpR/EnvZ regulation of SPI1 is more complicated and one can argue that low levels of  
253 OmpR-P play a role. Deletion of EnvZ leads to a significant decrease in *hilA* transcription (Fig. 6).  
254 This effect functions through OmpR; the *ompR* mutation is polar on *envZ* (36). It has long been  
255 known that loss of EnvZ, but not OmpR/EnvZ, affects SPI1 expression (5, 7, 14). We previously  
256 showed that this *envZ* phenotype is mediated through control of HilD protein activity (7), which is  
257 consistent with the data shown here. However, those previous experiments were performed in  
258 late stationary phase. In the exponential phase experiments shown here, we also see an effect  
259 on *hilD* expression in the *hilD* null strain. In *E. coli*, there are low levels of OmpR-P in the *envZ*  
260 null strain, due to phosphorylation of OmpR by acetyl phosphate (50-52). Thus, it appears that  
261 low levels of OmpR-P are actively leading to decreased HilD protein activity (7) and perhaps *hilD*  
262 transcription/translation through unknown mechanisms. This is consistent with overall activation  
263 of SPI1 in high osmolarity, which would further be enhanced by OmpR-mediated repression of  
264 *micC*.

265 These results emphasize the role of HilD as the major signal integration point for control  
266 of the SPI1 T3SS. Most regulatory input is via post-transcriptional control of HilD, affecting HilD

267 activity via protein-protein interactions, *hilD* translation, or mRNA stability (6-8, 29, 53), although  
268 the mechanisms are understood in only a few cases. We know that *hilD* translation is affected by  
269 binding of the RNA binding protein CsrA in the 39 nt *hilD* 5' UTR (29, 54). Translation initiation is  
270 also controlled by the sRNAs FnrS, ArcZ (8) and MicC, all of which base pair at the ribosome  
271 binding site. All three of these sRNAs affect SPI1 expression during intestinal infection in the  
272 animal. More detailed analyses are required to determine the mechanisms and physiological role  
273 of additional sRNAs identified as affecting overall control of the T3SS (8).

## 274 MATERIAL AND METHODS

275 **Bacterial strains and growth conditions.** Bacterial strains and plasmids used in this study are  
276 described in Table S1. All *Salmonella* enterica serovar Typhimurium strains are isogenic  
277 derivatives of strain 14028 [American Type Culture Collection (ATCC)] and were constructed  
278 using P22 HT105/1 int-201 (P22)- mediated transduction. Deletion of genes or insertion of  
279 antibiotic resistance cassettes was performed using  $\lambda$ -red mediated recombination (55, 56).  
280 Insertions and deletions were confirmed by PCR and mutations were transferred into  
281 unmutagenized backgrounds by P22 transduction. In some cases, antibiotic resistance cassettes  
282 were removed using the temperature-sensitive plasmid pCP20 carrying the FLP recombinase  
283 (57). To create transcriptional *lacZ* fusions to MicC, the insertion mutation in MicC was converted  
284 to a transcriptional *lac* fusion using FLP-mediated recombination with plasmid pKG136, as  
285 previously described (56). The translational *lacZ* reporter fusions in *E. coli* were constructed using  
286 lambda Red-mediated recombination in strain PM1205, as described previously (8, 31).

287 Strains were routinely cultured in lysogeny broth (LB; 10% tryptone, 5% yeast extract, 5%  
288 NaCl). For SPI1 expression experiments, cells were grown in No Salt LB (NSLB; 10% tryptone,  
289 5% yeast extract, 0% NaCl) or High Salt LB (HSLB; 10% tryptone, 5% yeast extract, 10% NaCl).  
290 All strains were grown at 37°C with aeration, except for the strains containing the temperature-  
291 sensitive plasmid pCP20 or pKD46, which were grown at 30°C. Antibiotics were used at the  
292 following final concentrations: ampicillin (Ap, 100  $\mu$ g/mL), kanamycin (Km, 50  $\mu$ g/mL),  
293 chloramphenicol (Cm, 20  $\mu$ g/mL), apramycin (Apr, 50  $\mu$ g/mL) and tetracycline (Tet, 10  $\mu$ g/mL).

294 **Construction of plasmids and site-directed mutagenesis.** The MicC small RNA was amplified  
295 from the *S. Typhimurium* 14028 genome using oligonucleotides pairs F-AatII-MicC and R-EcoRI-  
296 MicC and cloned into the pBR-*plac* vector (31) after digestion with AatII and EcoRI restriction  
297 enzymes, creating pMicC. The *hilD* mRNA/MicC sRNA interactions were predicted using the  
298 IntaRNA RNA-RNA interaction tool (58). Mutations were introduced into the pMicC plasmid using

299 a QuikChange Lightning site-directed mutagenesis kit (Stratagene). Oligonucleotides used in this  
300 study are listed in Table S2.

301 **β-Galactosidase assays.** β-Galactosidase assays were performed using a microtiter plate assay  
302 as previously described (49). Briefly, *Salmonella* strains were inoculated in NSLB medium and  
303 grown ON at 37°C on a roller drum. These cultures were subsequently diluted 1:100 into 2 ml of  
304 HSLB medium and grown at 37°C on a roller drum for 3 hr or 8 hr (where indicated). For *E. coli*  
305 cultures, strains were initially inoculated into LB and grown overnight, then subcultured 1:100 into  
306 2 ml of LB medium with 100 μM IPTG and 0.001% arabinose and grown at 37°C on a roller drum  
307 for 3 hr. β-Galactosidase activity units are defined as [μmol of orthonitrophenol (ONP) formed  
308 min<sup>-1</sup>] x 10<sup>6</sup>/(OD<sub>600</sub> x ml of cell suspension).

309 **In vitro and in vivo competition assays.** All animal work was reviewed and approved by the  
310 University of Illinois Institutional Animal Care and Use Committee (IACUC). Procedures were  
311 performed in our AAALAC accredited facility in accordance with University and PHS guidelines  
312 under protocol 15214. Competition assays in vivo and in vitro were performed using isogenic wild  
313 type and Δ*micC*, or Δ*SPI1* and Δ*micC* Δ*SPI1* mutants. Briefly, strains were grown overnight in LB.  
314 For oral infections, strains were mixed 1:1, washed, and suspended in 0.1 M phosphate buffered  
315 saline (pH 8) to an adjusted cfu ml<sup>-1</sup> of 5x10<sup>8</sup> (for wild type vs Δ*micC*) or 10<sup>9</sup> (for Δ*SPI1* vs Δ*micC*  
316 Δ*SPI1*). Before infection, food and water were withheld for 4 h, and then mice were inoculated  
317 with 200 μl of cell suspension by oral gavage. For intraperitoneal infections, 1:1 cell mixtures were  
318 diluted to 10<sup>3</sup> cfu ml<sup>-1</sup> in phosphate buffered saline (pH 7). Mice were inoculated with 200 μl of  
319 cell suspension by intraperitoneal (IP) injection. All inocula were diluted and plated on LB and  
320 then replica plated to appropriate antibiotic medium to determine the exact ratios of strains. After  
321 3.5 days of infection, mice were sacrificed by CO<sub>2</sub> asphyxiation and the spleens and small  
322 intestines were dissected from orally infected mice, or the spleens were dissected from IP infected  
323 mice. Tissues were mechanically homogenized in PBS with 15% glycerol and appropriate  
324 dilutions were plated on LB containing the appropriate antibiotics and subsequently replica plated  
325 to determine the ratio of strains recovered. In vitro competitions were performed simultaneously  
326 by subculturing 10<sup>3</sup> cfu of the same inocula used for the in vivo experiments into 2 mL of LB. The  
327 cultures were incubated overnight at 37 °C with aeration, diluted, and plated on LB. Resulting  
328 colonies were replica plated onto LB containing the appropriate antibiotics. Results are presented  
329 as competitive index (CI), calculated as (percentage of strain A recovered/percentage of strain B  
330 recovered)/(percentage of strain A inoculated/percentage of strain B inoculated).

### 331 **ACKNOWLEDGEMENTS**

332 This work was funded by NIH grant R01 GM120182 to JMS and CKV.

## REFERENCES

1. G. B. D. Non-Typhoidal Salmonella Invasive Disease Collaborators. 2019. The global burden of non-typhoidal salmonella invasive disease: a systematic analysis for the Global Burden of Disease Study 2017. *Lancet Infect Dis* 19:1312-1324.  
[https://doi.org/10.1016/S1473-3099\(19\)30418-9](https://doi.org/10.1016/S1473-3099(19)30418-9).
2. Carter PB, Collins FM. 1974. The route of enteric infection in normal mice. *J Exp Med* 139:1189-203. <https://doi.org/10.1084/jem.139.5.1189>.
3. Clark MA, Jepson MA, Simmons NL, Hirst BH. 1994. Preferential interaction of *Salmonella typhimurium* with mouse Peyer's patch M cells. *Res Microbiol* 145:543-52.  
[https://doi.org/10.1016/0923-2508\(94\)90031-0](https://doi.org/10.1016/0923-2508(94)90031-0).
4. Galan JE, Lara-Tejero M, Marlovits TC, Wagner S. 2014. Bacterial type III secretion systems: specialized nanomachines for protein delivery into target cells. *Annu Rev Microbiol* 68:415-38. <https://doi.org/10.1146/annurev-micro-092412-155725>.
5. Ellermeier CD, Ellermeier JR, Slauch JM. 2005. HilD, HilC and RtsA constitute a feed forward loop that controls expression of the SPI1 type three secretion system regulator hilA in *Salmonella enterica* serovar Typhimurium. *Mol Microbiol* 57:691-705.  
<https://doi.org/10.1111/j.1365-2958.2005.04737.x>.
6. Grenz JR, Cott Chubiz JE, Thaprawat P, Slauch JM. 2018. HilE Regulates HilD by Blocking DNA Binding in *Salmonella enterica* Serovar Typhimurium. *J Bacteriol* 200.  
<https://doi.org/10.1128/JB.00750-17>.
7. Golubeva YA, Sadik AY, Ellermeier JR, Slauch JM. 2012. Integrating global regulatory input into the *Salmonella* pathogenicity island 1 type III secretion system. *Genetics* 190:79-90.  
<https://doi.org/10.1534/genetics.111.132779>.
8. Kim K, Golubeva YA, Vanderpool CK, Slauch JM. 2019. Oxygen-dependent regulation of SPI1 type three secretion system by small RNAs in *Salmonella enterica* serovar Typhimurium. *Mol Microbiol* 111:570-587. <https://doi.org/10.1111/mmi.14174>.
9. Hor J, Matera G, Vogel J, Gottesman S, Storz G. 2020. Trans-Acting Small RNAs and Their Effects on Gene Expression in *Escherichia coli* and *Salmonella enterica*. *EcoSal Plus* 9.  
<https://doi.org/10.1128/ecosalplus.ESP-0030-2019>.
10. Moller T, Franch T, Hojrup P, Keene DR, Bachinger HP, Brennan RG, Valentin-Hansen P. 2002. Hfq: a bacterial Sm-like protein that mediates RNA-RNA interaction. *Mol Cell* 9:23-30.  
[https://doi.org/10.1016/s1097-2765\(01\)00436-1](https://doi.org/10.1016/s1097-2765(01)00436-1).

11. De Lay N, Schu DJ, Gottesman S. 2013. Bacterial small RNA-based negative regulation: Hfq and its accomplices. *J Biol Chem* 288:7996-8003.  
<https://doi.org/10.1074/jbc.R112.441386>.
12. Slauch JM, Silhavy TJ. 1997. The porin regulon: a paradigm for the two-component regulatory systems, p 383-417. *In* Lin ECC, Lynch AS (ed), *Regulation of gene expression in Escherichia coli* doi:10.1007/978-1-4684-8601-8\_19. R.G. Landes Co., Austin, TX.
13. Lee AK, Detweiler CS, Falkow S. 2000. OmpR regulates the two-component system SsrA-ssrB in Salmonella pathogenicity island 2. *J Bacteriol* 182:771-81.  
<https://doi.org/10.1128/JB.182.3.771-781.2000>.
14. Lucas RL, Lee CA. 2001. Roles of hilC and hilD in regulation of hilA expression in Salmonella enterica serovar Typhimurium. *J Bacteriol* 183:2733-45.  
<https://doi.org/10.1128/JB.183.9.2733-2745.2001>.
15. Feng X, Oropeza R, Kenney LJ. 2003. Dual regulation by phospho-OmpR of ssrA/B gene expression in Salmonella pathogenicity island 2. *Mol Microbiol* 48:1131-43.  
<https://doi.org/10.1046/j.1365-2958.2003.03502.x>.
16. Mattison K, Kenney LJ. 2002. Phosphorylation alters the interaction of the response regulator OmpR with its sensor kinase EnvZ. *J Biol Chem* 277:11143-8.  
<https://doi.org/10.1074/jbc.M111128200>.
17. Andersen J, Delihias N, Ikenaka K, Green PJ, Pines O, Ilercil O, Inouye M. 1987. The isolation and characterization of RNA coded by the micF gene in Escherichia coli. *Nucleic Acids Res* 15:2089-101. <https://doi.org/10.1093/nar/15.5.2089>.
18. Aiba H, Matsuyama S, Mizuno T, Mizushima S. 1987. Function of micF as an antisense RNA in osmoregulatory expression of the ompF gene in Escherichia coli. *J Bacteriol* 169:3007-12. <https://doi.org/10.1128/jb.169.7.3007-3012.1987>.
19. Chen S, Zhang A, Blyn LB, Storz G. 2004. MicC, a second small-RNA regulator of Omp protein expression in Escherichia coli. *J Bacteriol* 186:6689-97.  
<https://doi.org/10.1128/JB.186.20.6689-6697.2004>.
20. Pfeiffer V, Papenfort K, Lucchini S, Hinton JC, Vogel J. 2009. Coding sequence targeting by MicC RNA reveals bacterial mRNA silencing downstream of translational initiation. *Nat Struct Mol Biol* 16:840-6. <https://doi.org/10.1038/nsmb.1631>.
21. Colgan AM, Kroger C, Diard M, Hardt WD, Puente JL, Sivasankaran SK, Hokamp K, Hinton JC. 2016. The Impact of 18 Ancestral and Horizontally-Acquired Regulatory Proteins upon the Transcriptome and sRNA Landscape of Salmonella enterica serovar Typhimurium. *PLoS Genet* 12:e1006258. <https://doi.org/10.1371/journal.pgen.1006258>.

22. Libby SJ, Goebel W, Ludwig A, Buchmeier N, Bowe F, Fang FC, Guiney DG, Songer JG, Heffron F. 1994. A cytolysin encoded by *Salmonella* is required for survival within macrophages. *Proc Natl Acad Sci U S A* 91:489-93. <https://doi.org/10.1073/pnas.91.2.489>.
23. Navarre WW, Halsey TA, Walthers D, Frye J, McClelland M, Potter JL, Kenney LJ, Gunn JS, Fang FC, Libby SJ. 2005. Co-regulation of *Salmonella enterica* genes required for virulence and resistance to antimicrobial peptides by SlyA and PhoP/PhoQ. *Mol Microbiol* 56:492-508. <https://doi.org/10.1111/j.1365-2958.2005.04553.x>.
24. Spory A, Bosserhoff A, von Rhein C, Goebel W, Ludwig A. 2002. Differential regulation of multiple proteins of *Escherichia coli* and *Salmonella enterica* serovar Typhimurium by the transcriptional regulator SlyA. *J Bacteriol* 184:3549-59. <https://doi.org/10.1128/JB.184.13.3549-3559.2002>.
25. Will WR, Brzovic P, Le Trong I, Stenkamp RE, Lawrenz MB, Karlinsey JE, Navarre WW, Main-Hester K, Miller VL, Libby SJ, Fang FC. 2019. The Evolution of SlyA/RovA Transcription Factors from Repressors to Countersilencers in Enterobacteriaceae. *mBio* 10. <https://doi.org/10.1128/mBio.00009-19>.
26. Ellison DW, Miller VL. 2006. Regulation of virulence by members of the MarR/SlyA family. *Curr Opin Microbiol* 9:153-9. <https://doi.org/10.1016/j.mib.2006.02.003>.
27. Shi Y, Latifi T, Cromie MJ, Groisman EA. 2004. Transcriptional control of the antimicrobial peptide resistance *ugtL* gene by the *Salmonella* PhoP and SlyA regulatory proteins. *J Biol Chem* 279:38618-25. <https://doi.org/10.1074/jbc.M406149200>.
28. Linehan SA, Rytönen A, Yu XJ, Liu M, Holden DW. 2005. SlyA regulates function of *Salmonella* pathogenicity island 2 (SPI-2) and expression of SPI-2-associated genes. *Infect Immun* 73:4354-62. <https://doi.org/10.1128/IAI.73.7.4354-4362.2005>.
29. Martinez LC, Yakhnin H, Camacho MI, Georgellis D, Babitzke P, Puente JL, Bustamante VH. 2011. Integration of a complex regulatory cascade involving the SirA/BarA and Csr global regulatory systems that controls expression of the *Salmonella* SPI-1 and SPI-2 virulence regulons through HilD. *Mol Microbiol* 80:1637-56. <https://doi.org/10.1111/j.1365-2958.2011.07674.x>.
30. Kim K, Palmer AD, Vanderpool CK, Slauch JM. 2019. The Small RNA PinT Contributes to PhoP-Mediated Regulation of the *Salmonella* Pathogenicity Island 1 Type III Secretion System in *Salmonella enterica* Serovar Typhimurium. *J Bacteriol* 201. <https://doi.org/10.1128/JB.00312-19>.



31. Mandin P, Gottesman S. 2009. A genetic approach for finding small RNAs regulators of genes of interest identifies RybC as regulating the DpiA/DpiB two-component system. *Mol Microbiol* 72:551-65. <https://doi.org/10.1111/j.1365-2958.2009.06665.x>.
32. Vogel J, Luisi BF. 2011. Hfq and its constellation of RNA. *Nat Rev Microbiol* 9:578-89. <https://doi.org/10.1038/nrmicro2615>.
33. Vanzo NF, Li YS, Py B, Blum E, Higgins CF, Raynal LC, Krisch HM, Carpousis AJ. 1998. Ribonuclease E organizes the protein interactions in the Escherichia coli RNA degradosome. *Genes Dev* 12:2770-81. <https://doi.org/10.1101/gad.12.17.2770>.
34. Lopez PJ, Marchand I, Joyce SA, Dreyfus M. 1999. The C-terminal half of RNase E, which organizes the Escherichia coli degradosome, participates in mRNA degradation but not rRNA processing in vivo. *Mol Microbiol* 33:188-99. <https://doi.org/10.1046/j.1365-2958.1999.01465.x>.
35. Viegas SC, Pfeiffer V, Sittka A, Silva IJ, Vogel J, Arraiano CM. 2007. Characterization of the role of ribonucleases in Salmonella small RNA decay. *Nucleic Acids Res* 35:7651-64. <https://doi.org/10.1093/nar/gkm916>.
36. Liljestrom P, Laamanen I, Palva ET. 1988. Structure and expression of the ompB operon, the regulatory locus for the outer membrane porin regulon in Salmonella typhimurium LT-2. *J Mol Biol* 201:663-73. [https://doi.org/10.1016/0022-2836\(88\)90465-2](https://doi.org/10.1016/0022-2836(88)90465-2).
37. Jones BD, Ghori N, Falkow S. 1994. Salmonella typhimurium initiates murine infection by penetrating and destroying the specialized epithelial M cells of the Peyer's patches. *J Exp Med* 180:15-23. <https://doi.org/10.1084/jem.180.1.15>.
38. Murray RA, Lee CA. 2000. Invasion genes are not required for Salmonella enterica serovar typhimurium to breach the intestinal epithelium: evidence that salmonella pathogenicity island 1 has alternative functions during infection. *Infect Immun* 68:5050-5. <https://doi.org/10.1128/IAI.68.9.5050-5055.2000>.
39. Ballesteros MF, Torrez Lamberti MF, Farizano JV, Pescaretti MM, Delgado MA. 2019. Regulatory Effect of SlyA on rcsB Expression in Salmonella enterica Serovar Typhimurium. *J Bacteriol* 201. <https://doi.org/10.1128/JB.00673-18>.
40. Haider F, Lithgow JK, Stapleton MR, Norte VA, Roberts RE, Green J. 2008. DNA recognition by the Salmonella enterica serovar Typhimurium transcription factor SlyA. *Int Microbiol* 11:245-50. <https://doi.org/10.2436/20.1501.01.68>.
41. Stapleton MR, Norte VA, Read RC, Green J. 2002. Interaction of the Salmonella typhimurium transcription and virulence factor SlyA with target DNA and identification of

- members of the SlyA regulon. *J Biol Chem* 277:17630-7.  
<https://doi.org/10.1074/jbc.M110178200>.
42. Huang KJ, Igo MM. 1996. Identification of the bases in the ompF regulatory region, which interact with the transcription factor OmpR. *J Mol Biol* 262:615-28.  
<https://doi.org/10.1006/jmbi.1996.0540>.
43. Dolan KT, Duguid EM, He C. 2011. Crystal structures of SlyA protein, a master virulence regulator of Salmonella, in free and DNA-bound states. *J Biol Chem* 286:22178-85.  
<https://doi.org/10.1074/jbc.M111.245258>.
44. Cabezas CE, Briones AC, Aguirre C, Pardo-Este C, Castro-Severyn J, Salinas CR, Baquedano MS, Hidalgo AA, Fuentes JA, Morales EH, Meneses CA, Castro-Nallar E, Saavedra CP. 2018. The transcription factor SlyA from Salmonella Typhimurium regulates genes in response to hydrogen peroxide and sodium hypochlorite. *Res Microbiol* 169:263-278. <https://doi.org/10.1016/j.resmic.2018.04.003>.
45. Srikumar S, Kroger C, Hebrard M, Colgan A, Owen SV, Sivasankaran SK, Cameron AD, Hokamp K, Hinton JC. 2015. RNA-seq Brings New Insights to the Intra-Macrophage Transcriptome of Salmonella Typhimurium. *PLoS Pathog* 11:e1005262.  
<https://doi.org/10.1371/journal.ppat.1005262>.
46. Palmer AD, Kim K, Slauch JM. 2019. PhoP-Mediated Repression of the SPI1 Type 3 Secretion System in Salmonella enterica Serovar Typhimurium. *J Bacteriol* 201.  
<https://doi.org/10.1128/JB.00264-19>.
47. Slauch JM, Silhavy TJ. 1989. Genetic analysis of the switch that controls porin gene expression in Escherichia coli K-12. *J Mol Biol* 210:281-92. [https://doi.org/10.1016/0022-2836\(89\)90330-6](https://doi.org/10.1016/0022-2836(89)90330-6).
48. Kenney LJ, Anand GS. 2020. EnvZ/OmpR Two-Component Signaling: An Archetype System That Can Function Noncanonically. *EcoSal Plus* 9.  
<https://doi.org/10.1128/ecosalplus.ESP-0001-2019>.
49. Slauch JM, Silhavy TJ. 1991. cis-acting ompF mutations that result in OmpR-dependent constitutive expression. *J Bacteriol* 173:4039-48. <https://doi.org/10.1128/jb.173.13.4039-4048.1991>.
50. Bang IS, Kim BH, Foster JW, Park YK. 2000. OmpR regulates the stationary-phase acid tolerance response of Salmonella enterica serovar typhimurium. *J Bacteriol* 182:2245-52.  
<https://doi.org/10.1128/JB.182.8.2245-2252.2000>.

51. Russo FD, Silhavy TJ. 1991. EnvZ controls the concentration of phosphorylated OmpR to mediate osmoregulation of the porin genes. *J Mol Biol* 222:567-80.  
[https://doi.org/10.1016/0022-2836\(91\)90497-t](https://doi.org/10.1016/0022-2836(91)90497-t).
52. Slauch JM, Garrett S, Jackson DE, Silhavy TJ. 1988. EnvZ functions through OmpR to control porin gene expression in *Escherichia coli* K-12. *J Bacteriol* 170:439-41.  
<https://doi.org/10.1128/jb.170.1.439-441.1988>.
53. Chubiz JE, Golubeva YA, Lin D, Miller LD, Slauch JM. 2010. FliZ regulates expression of the *Salmonella* pathogenicity island 1 invasion locus by controlling HilD protein activity in *Salmonella enterica* serovar typhimurium. *J Bacteriol* 192:6261-70.  
<https://doi.org/10.1128/JB.00635-10>.
54. Altier C, Suyemoto M, Lawhon SD. 2000. Regulation of *Salmonella enterica* serovar typhimurium invasion genes by *csrA*. *Infect Immun* 68:6790-7.  
<https://doi.org/10.1128/IAI.68.12.6790-6797.2000>.
55. Datsenko KA, Wanner BL. 2000. One-step inactivation of chromosomal genes in *Escherichia coli* K-12 using PCR products. *Proc Natl Acad Sci U S A* 97:6640-5.  
<https://doi.org/10.1073/pnas.120163297>.
56. Ellermeier CD, Janakiraman A, Slauch JM. 2002. Construction of targeted single copy lac fusions using lambda Red and FLP-mediated site-specific recombination in bacteria. *Gene* 290:153-61. [https://doi.org/10.1016/s0378-1119\(02\)00551-6](https://doi.org/10.1016/s0378-1119(02)00551-6).
57. Cherepanov PP, Wackernagel W. 1995. Gene disruption in *Escherichia coli*: TcR and KmR cassettes with the option of Fip-catalyzed excision of the antibiotic-resistance determinant. *Gene* 158:9-14. [https://doi.org/10.1016/0378-1119\(95\)00193-a](https://doi.org/10.1016/0378-1119(95)00193-a).
58. Mann M, Wright PR, Backofen R. 2017. IntaRNA 2.0: enhanced and customizable prediction of RNA-RNA interactions. *Nucleic Acids Res* 45:W435-W439.  
<https://doi.org/10.1093/nar/gkx279>.

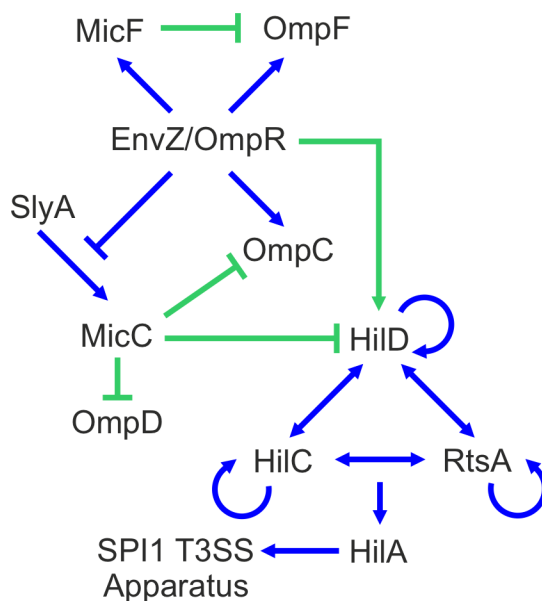

**FIG 1.** Simplified model of SPI1 T3SS regulatory circuit. Arrows indicate positive regulation, blunt ends indicate negative regulation, blue lines indicate transcriptional regulation, and green lines indicate post-transcriptional regulation.

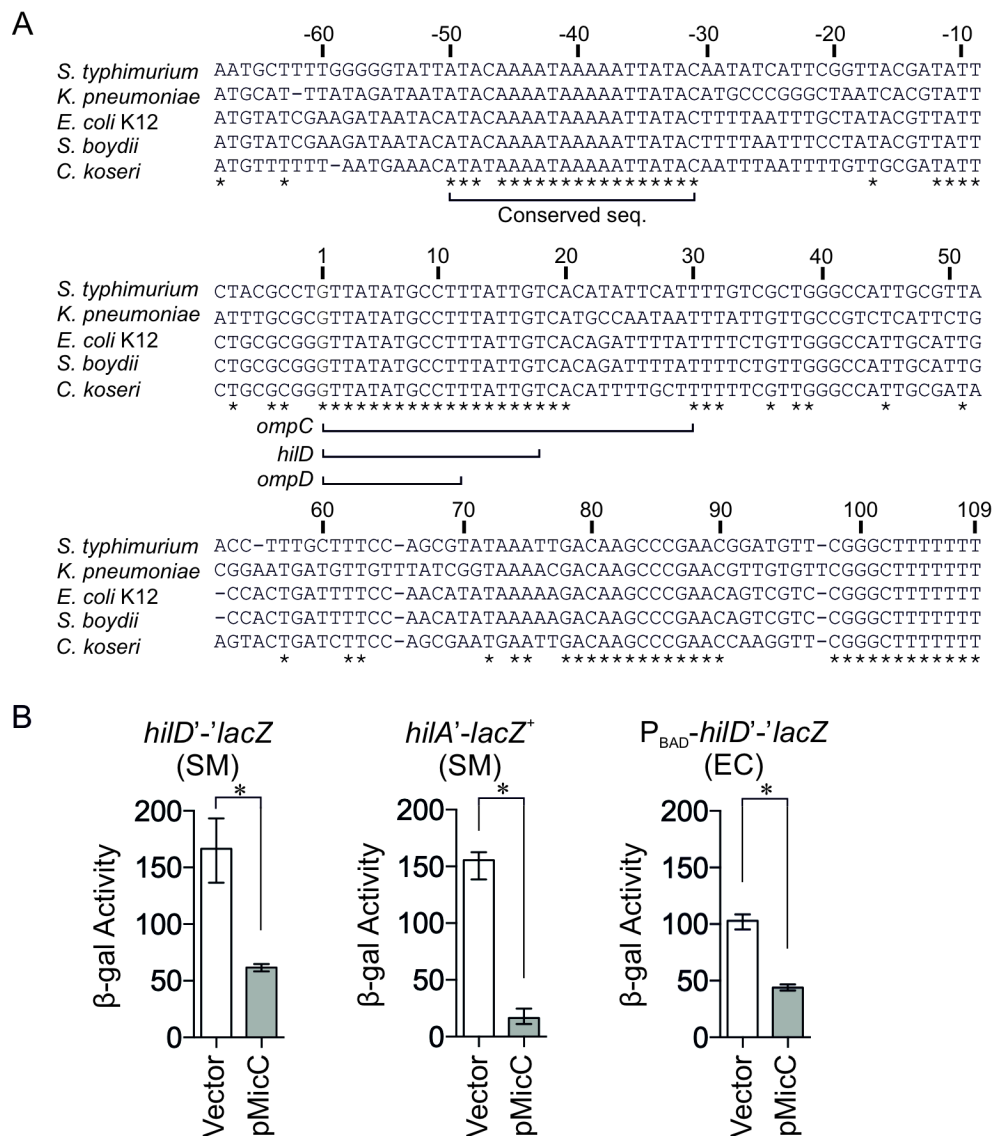

**FIG 2.** The conserved small RNA MicC negatively regulates the SPI1 T3SS by repressing *hilD* translation in *Salmonella*. (A) Alignment of the MicC sequences from various Enterobacteriaceae. The asterisks indicate sequence identity. Sequences corresponding to the regions of MicC that base pair to *ompC*, *ompD* and *hilD* are underlined. (B)  $\beta$ -gal activity in *Salmonella* (SM) strains harboring a *hilD'*-*lacZ* translational fusion or a *hilA'*-*lacZ*<sup>+</sup> transcriptional fusion, or an *E. coli* (EC) strain harboring a *hilD'*-*lacZ* translational fusion under control of an arabinose-inducible promoter. Each background contains the pBR-*plac* vector or pMicC plasmid.  $\beta$ -gal activity units are defined as ( $\mu\text{mol}$  of ONP formed  $\text{min}^{-1}$ )  $\times 10^6 / (\text{OD}_{600} \times \text{ml}$  of cell suspension). Results are shown as median with interquartile range and asterisks indicate significant differences between the datasets ( $n \geq 4$ ,  $P < 0.05$ , using a Mann-Whitney test). Strains used: JS749, JS892 and JMS6500, with plasmids pBR-*plac* vector or pMicC.

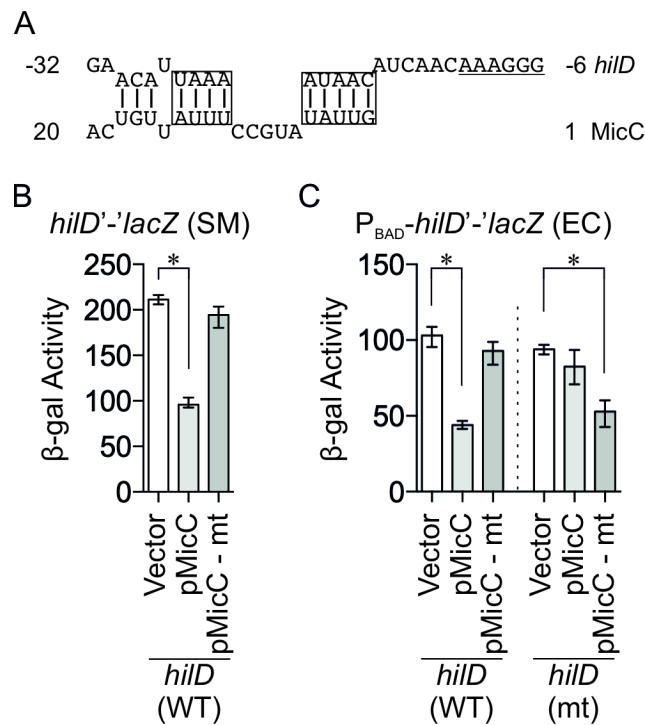

**FIG 3.** MicC negatively regulates *hilD* translation by base pairing near the RBS of the *hilD* mRNA. (A) Predicted base pairing interaction between MicC and *hilD* mRNA. The RBS is underlined; boxes represent the nucleotides changed in the complementary mutations. (B)  $\beta$ -gal activity in the *Salmonella* (SM) strain harboring the wild type *hilD*'-'*lacZ* translational fusion with vector pBRp/*lac*, wild type pMicC, or mutated pMicC-mt plasmid. (C)  $\beta$ -gal activity in *E. coli* (EC) strains harboring either the wild type or mutated *hilD*'-'*lacZ* translational fusion with empty vector, wild type pMicC, or mutated pMicC-mt plasmid. Results are shown as median with interquartile range. Asterisks indicate significant differences between the datasets ( $n \geq 4$ ,  $P < 0.05$ , using a Mann-Whitney test). Strains used: JS892, JMS6500 and JMS6510, with plasmids pBR-p/*lac* vector, pMicC, or pMicC-mt.



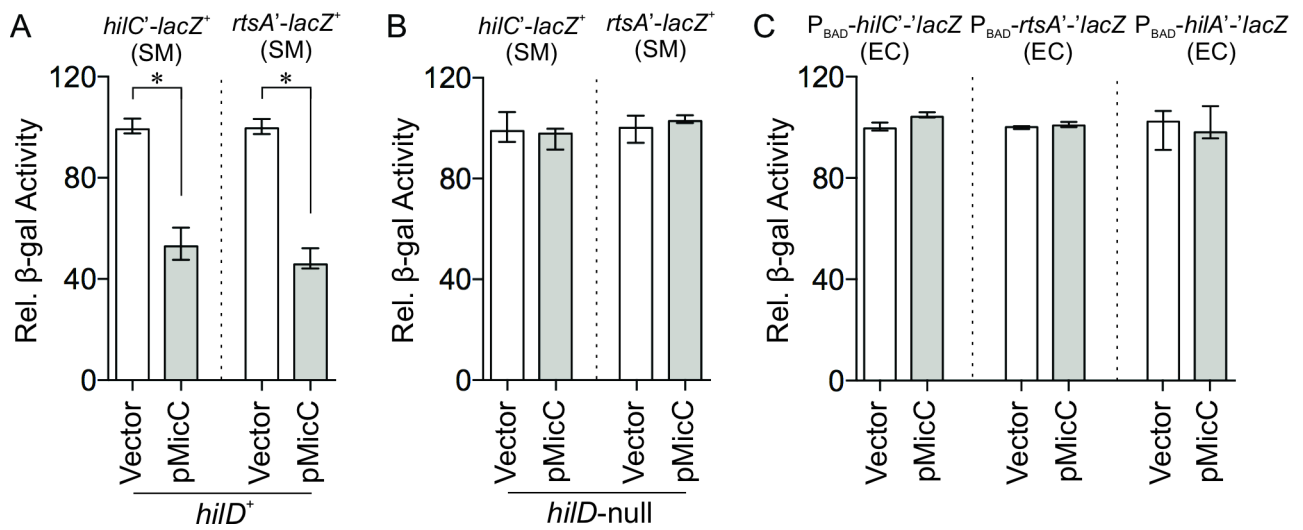

**FIG 4.** MicC does not regulate HilC, RtsA or HilA. Relative  $\beta$ -gal activity in *Salmonella hilC* or *hilA* transcriptional fusion strains that are (A) *hilD*<sup>+</sup> or (B) *hilD*-null. (C) Relative  $\beta$ -gal activity in *E. coli hilC*'-lacZ, *rtsA*'-lacZ or *hilA*'-lacZ translational fusion strains. All strains include either pBR-p*lac* vector or pMicC plasmid. Results are normalized to each strain containing the vector and are shown as median with interquartile range. Asterisks indicate significant differences between the datasets (n = 4, P < 0.05, using a Mann-Whitney test). Strains used: JS2187, JS2196, JS2551, JS2552, JMS6503, JMS6504 and JMS6505, with plasmids pBR-p*lac* vector or pMicC.

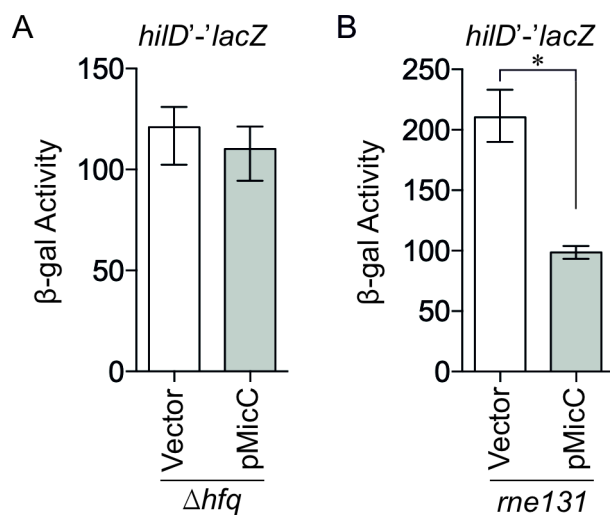

**FIG 5.** Regulation of *hilD* mRNA by MicC requires Hfq but not RNase E.  $\beta$ -gal activity in *Salmonella* (A) *hfq* or (B) *rne131* strains harboring the wild type *hilD*'-'*lacZ* translational fusion with vector pBR-*plac* or wild type pMicC. Results are shown as median with interquartile range and asterisks indicate significant differences between the datasets ( $n=4$ ,  $P < 0.05$ , using a Mann-Whitney test). Strains used: JS2118 and JS2119, with plasmids pBR-*plac* vector or pMicC.

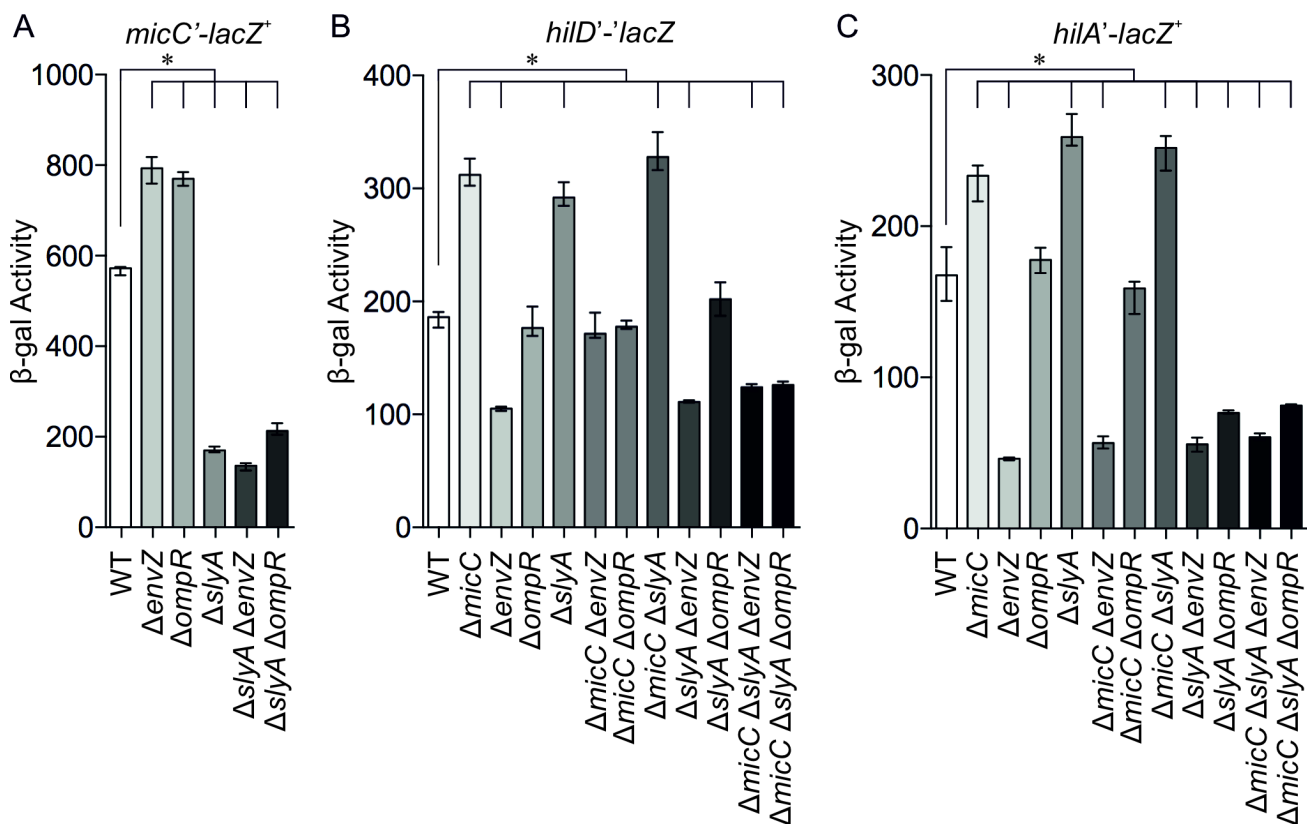

**FIG 6.** SlyA and EnvZ/OmpR regulate *micC* and the SPI1 T3SS. β-gal activity in *Salmonella* strains with a (A) *micC'*-*lacZ*<sup>+</sup> transcriptional fusion, (B) *hilD'*-*lacZ* translational fusion, or (C) *hilA'*-*lacZ*<sup>+</sup> transcriptional fusion in backgrounds containing the indicated mutations. Results are shown as median with interquartile range and asterisks indicate significant differences between the datasets ( $n \geq 4$ ,  $P < 0.05$ , using a Kruskal–Wallis test followed by post hoc Dunn’s multiple comparisons). Strains used: JS749, JS892, JS2523, JS2524, JS2525, JS2526, JS2527, JS2528, JS2529, JS2530, JS2531, JS2532, JS2533, JS2534, JS2535, JS2536, JS2537, JS2538, JS2539, JS2540, JS2541, JS2542, JS2543, JS2544, JS2545, JS2546, JS2547, JS2548, JS2549 and JS2550.

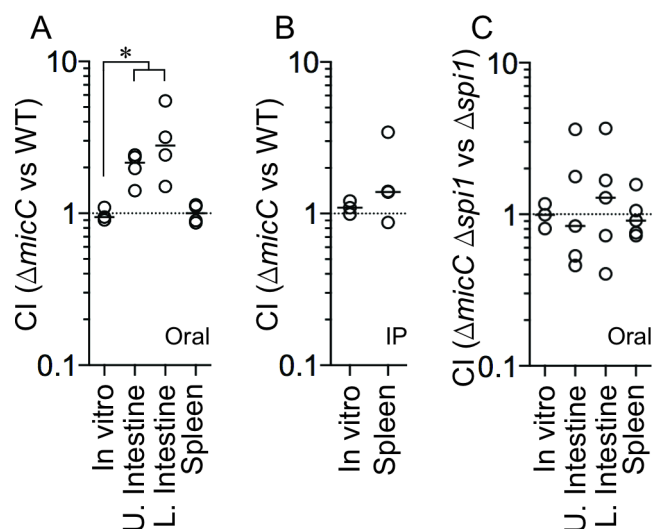

**FIG 7.** Deletion of MicC provides a fitness advantage in vivo. Competitive index (CI) for in vitro and in vivo infections comparing the following strains: (A)  $\Delta micC$  to WT after oral infection, (B)  $\Delta micC$  to WT after intraperitoneal (IP) infection or (C)  $\Delta micC \Delta spi1$  to  $\Delta spi1$  after oral infection. Upper small intestine (contains duodenum and jejunum), lower small intestine (contains ileum) and spleen were harvested after oral infections, whereas only the spleen was harvested after IP infections. Each circle represents the CI from a single mouse. For in vitro competitions, N=3; panel A, N=4; panels B and C, N=5. The horizontal bars indicate the median of each dataset, and the asterisk indicates significant differences ( $P < 0.05$ ) using a Mann-Whitney test. Strains used: JS135, JS2553, JS2554 and JS2555.
